# Supplementary material
Source: Copernicus journal article supplement (doi:10.5194/sand-2026-7)
Supplement: Supplementary file [file sand-2026-7-RC1-supplement.pdf]

Title: The long History of Promises by Accelerator-driven Systems

Author(s): Friederike Frieß et al.

MS No.: sand-2026-7

MS type: Research article

Special issue: Time as a safety factor: opportunities and challenges of timely nuclear waste disposal

The manuscript is accessible as preprint and currently open for interactive public discussion. During this discussion, you are kindly asked to post one or more referee comments; they can be anonymous or may be attributed and posted under your name, if you prefer. Please submit your comment at your earliest convenience.

Interactive comments are posted alongside the preprint and will remain permanently archived, publicly accessible, and fully citable.

Generally, a referee comment should be structured as follows: an initial paragraph or section evaluating the overall quality of the preprint ("general comments"), followed by a section addressing individual scientific questions/issues ("specific comments"), and by a compact listing of purely technical corrections at the very end ("technical corrections": typing errors, etc.).

General comments:

I appreciate this manuscript as an excellent and comprehensive contribution to the current discussion on alternative (to direct deep geological disposal) HAW treatment strategies. Although the authors definitely distrust promises of startup companies recently vehemently advertising the benefits – and even additional revenues – of ADS facilities, the manuscript stays rather impartial – also pointing out the slow progress of conventional HAW treatment and disposal efforts. Although the concept being not new at all, ADS might be an option, especially for countries with large stocks of weapon grade plutonium.

Specific comments:

The most important statement – although not new either – is on the necessity for final disposal capacities even when treating the majority of HAW in ADS machines. Those capacities might change with waste constituent separation (partitioning) and burning (transmutation) efficiencies. In this context, one aspect seems to be somewhat neglected. What about the energy costs for operating industrial scale reprocessing and transmutation target fabrication plants required to provide the fuel for the ADS fleet over many decades? What about volumes and radiotoxicity levels of all the generated secondary waste streams concentrating fission products, and process technology equipment highly activated during necessary reprocessing cycles?

Technical corrections:

I did not discover any technical errors or flaws.
